# Supplementary material
Source: MDPI journal article supplement (https://www.mdpi.com/2313-4321/9/3/42)
Supplement: s1 [file s1]

# Investigating the role of municipal waste treatment within the European Union through a novel created common sustainability point system

Konstantinos Tsimnadis<sup>1,\*</sup>, Grigorios L. Kyriakopoulos<sup>2,\*</sup>

<sup>1</sup>Department of Greenery and Urban Fauna, City of Athens, P. Kanellopoulou 5, 11525 Athens, Greece

<sup>2</sup>National Technical University of Athens, Heroon Polytechniou 9, Zografou Campus, 15780 Athens, Greece

\* Correspondence: k.tsimnadis@athens.gr(K.T.); gregkyr@chemeng.ntua.gr(G.L.K.)

**Table S1.** Calculated A points in each EU member state.

| COUNTRY (DATA RECORDING YEAR) | MUNICIPAL WASTE GENERATED (kg per capita) | "A" CATEGORY POINTS |
|-------------------------------|-------------------------------------------|---------------------|
| Austria (2021)                | 835                                       | -4.18               |
| Denmark (2022)                | 787                                       | -3.94               |
| Luxembourg (2022)             | 721                                       | -3.61               |
| Belgium (2022)                | 677                                       | -3.39               |
| Cyprus (2022)                 | 673                                       | -3.37               |
| Ireland (2020)                | 644                                       | -3.22               |
| Finland (2021)                | 630                                       | -3.15               |
| Malta (2022)                  | 618                                       | -3.09               |
| Germany (2022)                | 593                                       | -2.97               |
| Czechia (2021)                | 570                                       | -2.85               |
| France (2022)                 | 539                                       | -2.70               |
| Portugal (2021)               | 513                                       | -2.57               |
| Greece (2021)                 | 509                                       | -2.55               |
| Italy (2021)                  | 495                                       | -2.48               |
| Slovenia (2022)               | 487                                       | -2.44               |
| Slovakia (2020)               | 478                                       | -2.39               |
| Croatia (2022)                | 478                                       | -2.39               |
| Netherlands (2022)            | 473                                       | -2.37               |
| Spain (2022)                  | 467                                       | -2.34               |
| Lithuania (2022)              | 465                                       | -2.33               |
| Latvia (2021)                 | 461                                       | -2.31               |
| Bulgaria (2021)               | 445                                       | -2.23               |
| Hungary (2022)                | 406                                       | -2.03               |
| Sweden (2022)                 | 395                                       | -1.98               |
| Estonia (2022)                | 373                                       | -1.87               |
| Poland (2022)                 | 364                                       | -1.82               |

|                                 |     |       |
|---------------------------------|-----|-------|
| Romania (2022)                  | 301 | -1.51 |
| EU - 27 member states<br>(2022) | 513 | -2.57 |

**Table S2.** Calculated B points in each EU member state.

| <b>COUNTRY</b>        | <b>RECYCLING AND COMPOSTING<br/>RATES</b> | <b>"B" CATEGORY POINTS</b> |
|-----------------------|-------------------------------------------|----------------------------|
| Austria               | 68%                                       | 3.40                       |
| Germany               | 68%                                       | 3.40                       |
| Slovenia              | 59%                                       | 2.95                       |
| Netherlands           | 57%                                       | 2.85                       |
| Luxembourg            | 53%                                       | 2.65                       |
| Belgium               | 52%                                       | 2.60                       |
| Italy                 | 51%                                       | 2.55                       |
| Lithuania             | 45%                                       | 2.25                       |
| Denmark               | 45%                                       | 2.25                       |
| Czechia               | 43%                                       | 2.15                       |
| France                | 42%                                       | 2.10                       |
| Slovakia              | 42%                                       | 2.10                       |
| Finland               | 41%                                       | 2.05                       |
| Ireland               | 40%                                       | 2.00                       |
| Latvia                | 40%                                       | 2.00                       |
| Poland                | 39%                                       | 1.95                       |
| Sweden                | 38%                                       | 1.90                       |
| Spain                 | 36%                                       | 1.80                       |
| Bulgaria              | 35%                                       | 1.75                       |
| Hungary               | 32%                                       | 1.60                       |
| Croatia               | 29%                                       | 1.45                       |
| Estonia               | 29%                                       | 1.45                       |
| Portugal              | 26%                                       | 1.30                       |
| Greece                | 21%                                       | 1.05                       |
| Cyprus                | 16%                                       | 0.80                       |
| Romania               | 14%                                       | 0.70                       |
| Malta                 | 10%                                       | 0.50                       |
| EU - 27 member states | 48%                                       | 2.40                       |

**Table S3.**Calculated C points in each EU member state.

| <b>COUNTRY</b>        | <b>WASTE TO ENERGY AND INCINERATION RATES</b> | <b>"C" CATEGORY POINTS</b> |
|-----------------------|-----------------------------------------------|----------------------------|
| Sweden                | 60%                                           | 1.80                       |
| Finland               | 58%                                           | 1.74                       |
| Denmark               | 53%                                           | 1.59                       |
| Belgium               | 48%                                           | 1.44                       |
| Estonia               | 43%                                           | 1.29                       |
| Luxembourg            | 43%                                           | 1.29                       |
| Netherlands           | 42%                                           | 1.26                       |
| Ireland               | 32%                                           | 0.96                       |
| France                | 32%                                           | 0.96                       |
| Germany               | 31%                                           | 0.93                       |
| Austria               | 31%                                           | 0.93                       |
| Lithuania             | 26%                                           | 0.78                       |
| Poland                | 22%                                           | 0.66                       |
| Italy                 | 19%                                           | 0.57                       |
| Portugal              | 18%                                           | 0.54                       |
| Slovenia              | 13%                                           | 0.39                       |
| Spain                 | 12%                                           | 0.36                       |
| Hungary               | 12%                                           | 0.36                       |
| Czechia               | 12%                                           | 0.36                       |
| Slovakia              | 8%                                            | 0.24                       |
| Romania               | 5%                                            | 0.15                       |
| Latvia                | 3%                                            | 0.09                       |
| Bulgaria              | 3%                                            | 0.09                       |
| Greece                | 1%                                            | 0.03                       |
| Croatia               | 1%                                            | 0.03                       |
| Cyprus                | 1%                                            | 0.03                       |
| Malta                 | 0%                                            | 0.00                       |
| EU - 27 member states | 27%                                           | 0.81                       |

**Table S4.**Calculated D points in each EU member state.

| COUNTRY               | LANDFILL RATES | "D" CATEGORY POINTS |
|-----------------------|----------------|---------------------|
| Malta                 | 83%            | 0.83                |
| Greece                | 78%            | 0.78                |
| Romania               | 74%            | 0.74                |
| Cyprus                | 68%            | 0.68                |
| Bulgaria              | 62%            | 0.62                |
| Croatia               | 60%            | 0.60                |
| Hungary               | 54%            | 0.54                |
| Latvia                | 53%            | 0.53                |
| Spain                 | 52%            | 0.52                |
| Portugal              | 51%            | 0.51                |
| Slovakia              | 50%            | 0.50                |
| Czechia               | 45%            | 0.45                |
| Poland                | 39%            | 0.39                |
| France                | 26%            | 0.26                |
| Ireland               | 23%            | 0.23                |
| Italy                 | 20%            | 0.20                |
| Lithuania             | 16%            | 0.16                |
| Estonia               | 15%            | 0.15                |
| Slovenia              | 7%             | 0.07                |
| Luxembourg            | 4%             | 0.04                |
| Netherlands           | 1%             | 0.01                |
| Austria               | 1%             | 0.01                |
| Finland               | 1%             | 0.01                |
| Denmark               | 1%             | 0.01                |
| Germany               | 1%             | 0.01                |
| Sweden                | 0.5%           | 0.005               |
| Belgium               | 0%             | 0                   |
| EU - 27 member states | 23%            | 0.23                |
